# Supplementary material for: Studie Allergy to Peanuts imPacting Emotions And Life (APPEAL)
Source: Springer Nature journal article supplement (doi:10.1007/s00112-020-01094-5), 2020-12-22
Supplement: MOESM1 [file 112_2020_1094_MOESM1_ESM.docx]

**Anhang**

**Methoden**

*Studiendesign*

APPEAL war eine zweistufige Querschnittsstudie zur Untersuchung der psychosozialen Auswirkungen einer Erdnussallergie in acht europäischen Ländern (Deutschland, Großbritannien, Frankreich, Spanien, Dänemark, Irland, Italien und den Niederlanden). Für die vorliegende Publikation wurden ausschließlich Daten von deutschen Teilnehmern der APPEAL-Studie ausgewertet.

*Ablauf der Studie*

Die erste Studienphase (APPEAL-1) bestand aus einer vom APPEAL-Beirat entwickelten Online-Umfrage. Der APPEAL-Beirat setzte sich aus 8 Vertretern von Patientenorganisationen (je eine Organisation aus jedem der 8 Studienländer) und einem Fachgremium aus 5 Experten zusammen.

Die Umfrage zielte darauf ab, die Auswirkungen und Belastungen einer Erdnussallergie auf Betroffene und deren Betreuer zu analysieren. Für die Auswertung der meisten Fragen wurde eine 5-Punkte-Skala verwendet (1= geringste Auswirkung, 5=größte Auswirkung). Der Fragebogen umfasste demografische und klinische Merkmale sowie praktische Fragen zu Management und psychosozialen Auswirkungen der Erdnussallergie.

Die zweite Studienphase (APPEAL-2) bestand aus persönlichen oder telefonischen Interviews, in denen die Teilnehmer spontan beschreiben konnten, inwiefern sie sich von der Erdnussallergie beeinträchtigt fühlen. Zudem konnte der Interviewleiter vordefinierte Fragen verwenden.

Die Betreuer berichteten sowohl über die eigenen allergiebedingten Auswirkungen als auch über die Beeinträchtigungen der von ihnen betreuten Personen. Alle Interviews wurden aufgezeichnet und ins Englische übersetzt.

*Teilnehmer*

Für APPEAL-1 und APPEAL-2 wurden zwei unabhängige Teilnehmerstichproben rekrutiert. Die Rekrutierung der Teilnehmer erfolgte mittels Panelrekrutierung (APPEAL-2) bzw. über Patientenorganisationen und Panelrekrutierung (APPEAL-1).

Teilnehmer der APPEAL-1-Studie waren Erwachsene mit einer medizinisch bestätigten Erdnussallergie sowie Betreuer einer Person mit Erdnussallergie, die in Deutschland lebten und in den letzten zwei Monaten nicht an einer Marktforschungsstudie zur Erdnussallergie teilgenommen hatten.

Teilnehmer der APPEAL-2-Studie waren Kinder (8-12 Jahre), Jugendliche (13-17 Jahre) oder Erwachsene (18-30 Jahre) mit einer medizinisch bestätigten moderaten oder schweren Erdnussallergie, sowie Betreuter eines Kindes (4-17 Jahre) mit einer moderaten oder schweren Erdnussallergie, wohnhaft in Deutschland.

Von den Eltern der Teilnehmer arbeiteten zwei in Teilzeit, um zusätzliche Zeit für die Essenzubereitung ihres Kindes zur Verfügung zu haben. Ein anderes Elternteil nahm sich frei, um an Schulausflügen des Kindes teilnehmen zu können.

Teilnehmer, die im täglichen Leben noch nie eine Reaktion auf Erdnüssen gezeigt hatten (z.B. nur im Rahmen eines Provokationstests) wurden von APPEAL-2 ausgeschlossen. Ziel der Rekrutierung war eine Patientenzusammensetzung von mindestens 50% mit einer selbst berichteten Erdnussallergie und mindestens 25% mit einer bereits erfolgten lebensbedrohlichen Reaktion (Intubation oder intravenöses Adrenalin erforderlich) oder Verwendung eines AAI.

Jede Studienphase wurde von einer unabhängigen Ethikkommission überprüft und genehmigt (APPEAL-1: Freiburger Ethik-Kommission International; APPEAL-2: Western Independent Review Board). Die Teilnehmer erhielten vorab Informationen über die Studie und gaben vor der Teilnahme an beiden Phasen eine Einverständniserklärung ab.

*Analyse*

Die Daten der APPEAL-1-Studie wurden mittels deskriptiver Statistik für die gesamte Probe analysiert, die Daten aus Eigeneinschätzung und Proxy-Report wurden hierbei kombiniert.

Die Auswertung der demografischen APPEAL-2-Daten erfolgte mithilfe deskriptiver Statistik unter Verwendung einer thematischen Analyse. Der qualitative Text der Transkripte wurde hierbei codiert. Die Analyse von APPEAL-2 erfolgte anhand von MAXQDA, einem qualitativen Softwaretool. Der Sättigungspunkt, an dem keine neuen Informationen mehr aus zusätzlichen qualitativen Daten gewonnen wurden, wurde anhand von Sättigungstabellen bewertet (Kerr et al., 2010). Unter Verwendung der während der Analyse identifizierten Konzepte wurde ein konzeptionelles Modell entwickelt, das eine visuelle Darstellung der Schlüsselfaktoren und möglicher Beziehungsmuster ermöglicht.
