# Supplementary material for: Studie Allergy to Peanuts imPacting Emotions And Life (APPEAL)
Source: Springer Nature journal article supplement (doi:10.1007/s00112-020-01094-5), 2020-12-22
Supplement: MOESM2 [file 112_2020_1094_MOESM2_ESM.docx]

**Anhang**

**Tabellen**

**eTabelle 1: Zusammenfassung der demografischen Daten von APPEAL-1 und -2**

| **Charakteristik** | | **APPEAL-1** | | | | | **APPEAL-2** | | | | |
| --- | --- | --- | --- | --- | --- | --- | --- | --- | --- | --- | --- |
|  |  | Erwachsene (Selbst-einschätzung und Proxy-Bericht)  (N=68) | Kinder (Proxy-Bericht) Alter 0-3 (N=30) | Kinder (Proxy-Bericht) Alter 4-12 (N=152) | Jugendliche (Proxy-Bericht) Alter 13-17 (N=23) | Betreuer  (N=8) | | Erwachsene  (N=8) | Kinder  (N=8) | Jugendliche  (N=8) |
| Alter |  | 39,9 (15,9) | 2,5 (0,6) | 7,3 (2,4) | 14,2 (1,3) | 38,9 (6,0) | | 25 (5,1) | 8,5 (0,8) | 1515 (1,4) |
| Geschlecht | Männlich | 17 (25%) | 21 (70%) | 94 (62%) | 14 (61%) | 1 (13%) | | 3 (38%) | 7 (88%) | 4 (50%) |
|  | Weiblich | 51 (75%) | 9 (30%) | 58 (38%) | 9 (39%) | 7 (88%) | | 5 (63%) | 1 (13%) | 4 (50%) |
| Andere Lebens-mittel-allergien |  |  |  |  |  |  | |  |  |  |
|  | Nüsse | 34 (50%) | 11 (37%) | 57 (38%) | 11 (48%) | 1 (13%)* | | 1 (13%) | 4 (50%) | 0 (0%) |
|  | Andere | 58 (85%) | 15 (50%) | 87 (57%) | 19 (83%) | 2 (25%) | | 3 (38%) | 1 (13%) | 4 (50%) |
| Verordnung für AAI | Ja | 24 (35%) | 29 (97%) | 142 (93%) | 17 (74%) | 8 (100%)* | | 6 (75%) | 8 (100%) | 8 (100%) |

AAI, Adrenalin-Autoinjektor; *Lebensmittelallergie des Kindes/Verordnung für AAI

**eTabelle 2: Tabelle mit Beispielzitaten von deutschen APPEAL-2-Teilnehmern**

|  | **Beispielzitate von Erwachsenen, Jugendlichen und Kindern** | **Beispielzitate von Betreuern** |
| --- | --- | --- |
| **Tägliche Bewältigungsstrategien** | | |
| Überwachung | “Ich bin ein Teamleiter bei der Arbeit und das bedeutet, dass ich Teammitgliedern manchmal etwas zeigen muss, also muss ich ihre Maus berühren. Aus diesem Grunde können sie nichts berühren, was Erdnüsse enthält und Spuren von Erdnüssen auf ihrer Ausrüstung hinterlassen könnte. Wenn ich meine Augen berühre, nachdem ich etwas mit Erdnusspartikeln berührt habe, zeige ich sofort Symptome. Ich habe mir selbst beigebracht, meine Augen oder meine Nase nicht zu berühren, ohne vorher die Hände zu waschen.” [weibliche Teilnehmerin, 24 Jahre alt] | „Wir sind sehr vorsichtig, und sie ist es auch. Wir stellen sicher, dass es im Haushalt keine Erdnüsse gibt, und auch Verwandte und Freunde haben wir darum gebeten, dass es nirgendwo Erdnüsse gibt.” [Betreuerin eines 14-jährigen Mädchens] |
| Kommunikation | „Ich rede nicht gerne über die Allergie, da es mir ein bisschen peinlich ist.“ [männlicher Teilnehmer, 14 Jahre alt] | „Bei Geburtstagfeiern mit neuen Kindern ist es für mich schon zur Routine geworden, dass ich die Mutter informiere und bescheid gebe, dass sie gerne kommen würde, aber ein Problem mit Nüssen hat.“ [Betreuerin eines 5-jährigen Mädchens] |
| Praktische Aspekte | „Wenn wir essen gehen, habe ich eine Liste der Lokale, die ich besuchen kann. Ich kontaktiere die vorab Restaurants per E-Mail.” [weibliche Teilnehmerin, 29 Jahre alt] | „Es nimmt viel Zeit in Anspruch, da ich viel mehr Zeit mit Kochen verbringe als andere Mütter.“ [Betreuerin eines 14-jährigen Mädchens] |
| **Auswirkungen auf die HRQL** | | |
| Soziale und schulische Aktivitäten | “Ich mag es nicht, auf Partys zu sein, auf denen es Erdnüsse gibt. Manchmal werde ich völlig paranoid. In der Vergangenheit habe ich angefangen zu weinen, sobald Erdnüsse angeboten wurden, weil ich in Panik geraten bin.“ [weibliche Teilnehmerin, 14 Jahre alt] | „Wenn wir unterwegs sind und es Kaffee und Kuchen gibt, stellen wir sicher, dass es mindestens einen Kuchen gibt, den sie essen kann. Bei großen Veranstaltungen, bei denen jeder Kuchen mitbringt und man die Zutaten nicht kennt, isst sie nichts davon.  Wenn ich weiß, dass es auf einer Veranstaltung auf jeden Fall Erdnüsse gibt, gehen wir nicht hin.” [Betreuerin eines 14-jährigen Mädchens] |
| Beziehungen | „Einige meiner Freunde haben es nicht ernst genommen und haben nicht komplett auf Erdnüsse verzichtet, so dass wir uns nicht küssen konnten, wenn wir uns trafen. Möglicherweise wollten einige Leute kein zweites Date mit mir, weil meine Allergien zu viel Arbeit waren.“ [weibliche Teilnehmerin, 24 Jahre alt] | „Er kann nicht alles essen, aber seine Geschwister können alles essen. Es ist ein Problem sicherzustellen, dass es da keine Konflikte gibt. Ja, das ist schon stressig.” [Betreuerin eines 6-jährigen Jungen] |
| Emotionen | „Es gibt immer eine gewisse Angst, dass du eines Tages nachlässig sein könntest und noch etwas Schlimmeres passiert, als nur das Kitzeln und das Engegefühl im Hals.” [Weibliche Teilnehmerin, 15 Jahre alt] | “Es ist das Gefühl, ständig Angst zu haben, dass etwas passiert. Kürzlich hat die Schule angerufen und ich hatte sogar Angst, den Hörer abzunehmen, weil ich dachte, es sei etwas passiert. (…) Dieses Gefühl ist immer da.“ [Betreuer eines 9-jährigen Jungen] |
| Arbeit | „Ich persönlich habe den Schritt in die Selbständigkeit unternommen. Ich habe viel getan um mein tägliches Leben selbst zu gestalten.Das macht es einfacher. Ich muss nicht die ganze Zeit mit Kollegen darüber diskutieren, was sie zum Mittagessen essen können und was nicht.“  [Weibliche Teilnehmerin, 30 Jahre alt] | „Ich kann kein normales Berufsleben führen, da ich aufgrund der Allergie meiner Tochter wenig Zeit habe. Ich arbeite nur nachmittags und mein Mann arbeitet von zu Hause aus.“ [Betreuerin eines 14-jährigen Mädchens] |

**eTabelle 3: Fallstudien aus APPEAL-2, in denen Teilnehmer über geringe, moderate und schwerwiegende Beeinträchtigungen aufgrund einer Erdnussallergie berichten**

|  | **Geringe Beeinträchtigung** | **Moderate Beeinträchtigung** | **Schwerwiegende Beeinträchtigung** |
| --- | --- | --- | --- |
| **Demografische Daten** | Weibliche Teilnehmerin, 17 Jahre alt | Männlicher Teilnehmer, 8 Jahre alt | Weibliche Teilnehmerin, 30 Jahre alt |
| - **Schweregrad** - **AAI** - **Sicherheit** - **Kontrolle** | - Moderat - Ja - Sicher - Volle Kontrolle | - Schwer - Ja - Sicher - Gute Kontrolle | - Schwer - Ja - Sehr sicher - Volle Kontrolle |
|  | - Diagnostiziert im Alter von 14 Jahren - Letzte Reaktion vor einem Jahr, verwendete einen AAI | - Eine Reaktion im Alter von 3 Jahren mit Anschwellen des Gesichtes nach Verzehr eines Nussriegels - Transport ins Krankenhaus mit Krankenwagen | - Ungefähr 10 milde und 3 bis 4 schwere Reaktionen - Schwerwiegendste Reaktion: Bewusstlosigkeit und intravenöse Medikation |
| **Beeinträchtigung** | - Muss Zutaten überprüfen und andere über ihre Erdnussallergie informieren - Allergie hat aber keine großen Auswirkungen | - Er kann Getränke nicht mit anderen teilen und trägt einen Hüftgurt mit seinem AAI - Seine Freunde müssen sich nach dem Verzehr von Erdnüssen die Hände waschen - Er darf die Party eines Freundes nicht besuchen, da dessen Eltern kein Deutsch sprechen und seine eigenen Eltern nichts über seine Erdnussallergie erklären können | **Soziales:**   - Wird manchmal nicht zum Abendessen mit Freunden eingeladen - Meidet oder verlässt Ereignisse, bei denen es Erdnüsse gibt   **Wachsamkeit:**   - Überprüft Kosmetika und informiert sich bei Herstellern über Erdnussspuren - Wäscht sich die Hände, duscht, und wechselt die Kleidung, wenn Kontakt mit Erdnüssen aufgetreten ist   **Beziehungen:**   - Wartet 3 Stunden, bevor sie ihren Partner küsst, wenn er Erdnüsse gegessen hat - Bittet ihn zu duschen und sich umzuziehen   **Arbeit:**   - Arbeitet von zu Hause aus, sodass sie sich keine Gedanken darüber machen muss was ihre Kollegen essen |
